# Supplementary material
Source: PubMed Central journal article supplement (PMC4362222)
Supplement: JCI77075sd.pdf [file JCI77075sd.pdf]

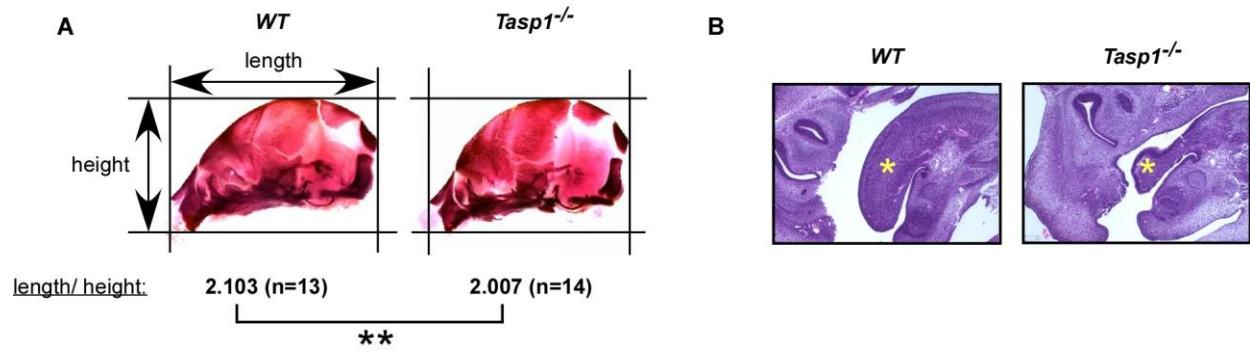

**Figure S1**

Head malformations in *Tasp1*<sup>-/-</sup> mice in mixed genetic background (129SvJ:C57Bl/6). **(A)** Skulls of *WT* and *Tasp1*<sup>-/-</sup> newborns (129SvJ:C57Bl/6) (N2), stained with alizarin red, show a marked difference in size and dimensions. The average ratios of skull height to its length are shown. \*\**p* < 0.01, unpaired two-tailed Student's *t*-test. **(B)** Regions of the jaw and tongue of E14.5 *WT* and *Tasp1*<sup>-/-</sup> embryos are shown by H&E in sagittal sections. Note the difference in size of the tongues denoted by yellow asterisks.

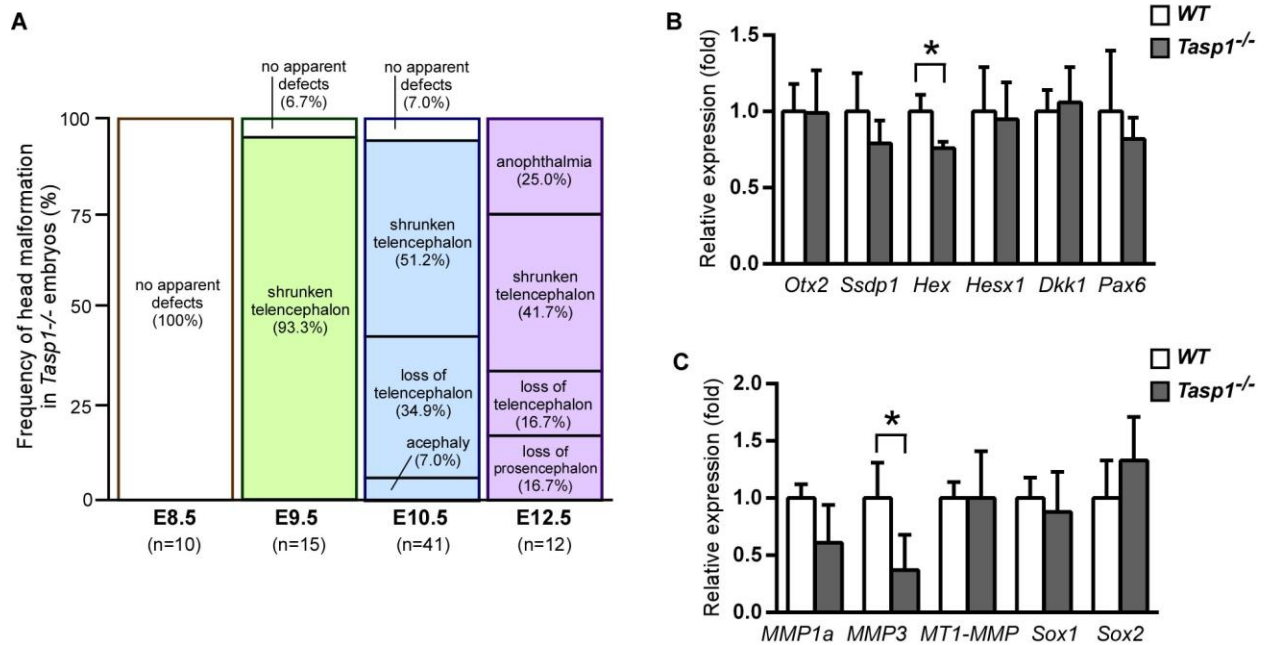

**Figure S2**

Craniofacial malformations in *Tasp1*<sup>-/-</sup> mice during embryogenesis. **(A)** Frequencies of the various head malformations observed in *Tasp1*<sup>-/-</sup> embryos at E8.5-E12.5. **(B)** Expression of key genes associated with head formation. Quantitative RT-PCR analyses of the indicated genes were performed using RNA isolated from *WT* and *Tasp1*<sup>-/-</sup> E9.5 embryo head. n=3-6 (*TFIIA*<sup>nc/nc</sup>) and n=3 (*WT*). Error bars represent SD. \*p < 0.05, unpaired two-tailed Student's t-test. **(C)** Quantitative RT-PCR analyses of *MMPs* and *Sox* genes for *WT* and *Tasp1*<sup>-/-</sup> E10.5 embryo head RNA. n=3-5 (*TFIIA*<sup>nc/nc</sup>) and n=3-4 (*WT*). Error bars represent SD. \*p < 0.05, unpaired two-tailed Student's t-test.

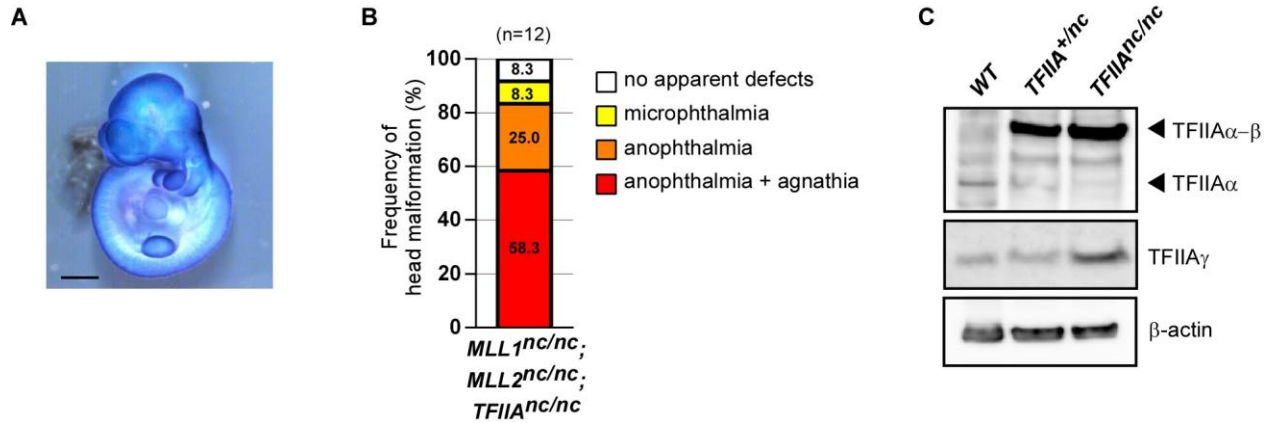

### Figure S3

(A) Whole mount in situ hybridization with *TFIIA* $\alpha$ - $\beta$  antisense probes on E10.5 WT embryo. (B) The frequencies of head malformations in E14.5 *MLL1*<sup>nc/nc</sup>; *MLL2*<sup>nc/nc</sup>; *TFIIA*<sup>nc/nc</sup> embryos. (C) Immunoblots detecting *TFIIA* $\alpha$ - $\beta$ , *TFIIA* $\alpha$ , *TFIIA* $\gamma$ , and  $\beta$ -actin in lysates from WT, *TFIIA*<sup>+nc</sup>, and *TFIIA*<sup>nc/nc</sup> E10.5 embryo heads. In contrast to *TFIIA* $\alpha$ - $\beta$ , *TFIIA* $\gamma$  is not markedly stabilized in the *TFIIA*<sup>+nc</sup> lysate.

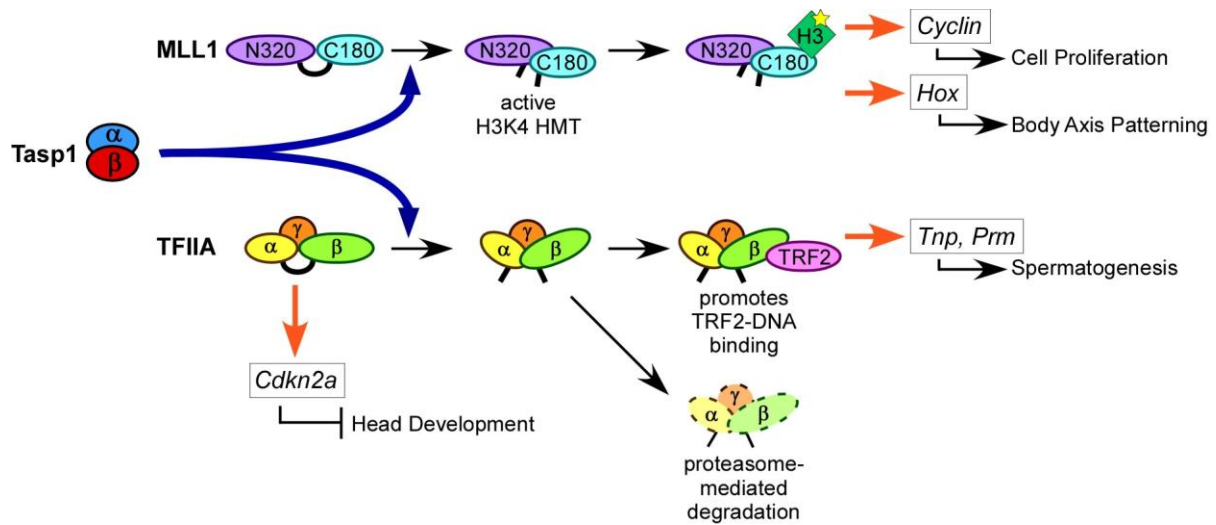

**Figure S4**

Summarized diagram of the biological functions of Taspase1 in embryogenesis. Taspase1-mediated proteolysis of MLL1 promotes maturation of MLL1's histone methyltransferase activity, which in turn, leads to upregulation of *Cyclin* and *Hox* genes via histone H3 lysine-4 trimethylation. In testes, Taspase1-mediated proteolysis of TFIIA promotes targeting of TRF2 to the promoters of spermiogenic genes, *Tnp* and *Prm*, to drive spermatogenesis. During head morphogenesis, this Taspase1-mediated proteolysis of TFIIA induces TFIIA susceptibility to proteasome-mediated degradation, thereby limiting transcriptional activation of *Cdkn2a*.

| Gene set                                 | Size | NES  | NOM p-val |
|------------------------------------------|------|------|-----------|
| RACCYCDPATHWAY                           | 21   | 1.61 | 0.000     |
| <b>CELL_CYCLE_KEGG</b>                   | 76   | 1.57 | 0.000     |
| HSA04115_P53_SIGNALING_PATHWAY           | 57   | 1.57 | 0.000     |
| <b>CELLCYCLEPATHWAY</b>                  | 20   | 1.55 | 0.000     |
| CALCINEURINPATHWAY                       | 18   | 1.54 | 0.000     |
| HSA05219_BLADDER_CANCER                  | 36   | 1.48 | 0.000     |
| HSA05218_MELANOMA                        | 66   | 1.46 | 0.000     |
| HSA05214_GLIOMA                          | 58   | 1.45 | 0.000     |
| RHOPATHWAY                               | 27   | 1.45 | 0.101     |
| CARM_ERPATHWAY                           | 24   | 1.43 | 0.080     |
| HSA04150_MTOR_SIGNALING_PATHWAY          | 42   | 1.42 | 0.095     |
| <b>G1PATHWAY</b>                         | 23   | 1.42 | 0.080     |
| <b>G2PATHWAY</b>                         | 19   | 1.40 | 0.000     |
| CCR3PATHWAY                              | 20   | 1.31 | 0.204     |
| ATMPATHWAY                               | 17   | 1.29 | 0.181     |
| DEATHPATHWAY                             | 26   | 1.27 | 0.191     |
| HSA03022_BASAL_TRANSCRIPTION_FACTORS     | 28   | 1.25 | 0.083     |
| HSA05220_CHRONIC_MYELOID_LEUKEMIA        | 71   | 1.22 | 0.201     |
| HSA05223_NON_SMALL_CELL_LUNG_CANCER      | 48   | 1.22 | 0.107     |
| HSA00592_ALPHA_LINOLENIC_ACID_METABOLISM | 15   | 1.19 | 0.224     |

**Table S1**

GSEA list of the top 20 overrepresented gene sets in expression signals of *Taspl*<sup>-/-</sup> embryo heads. Gene set sizes, normalized enrichment scores (NES), and nominal p-values (NOM p-value) are included. Gene sets related to cell proliferation are shown in bold.

|                                       |                                 |
|---------------------------------------|---------------------------------|
| Mouse <i>p16Ink4a</i> F               | ATTGGGCGGGCACTGAATCTC           |
| Mouse <i>p16Ink4a</i> R               | TCTGTCTGCAGCGGACTCC             |
| Mouse <i>p19Arf</i> F                 | GTTCTTGGTCACTGTGAGGATTCAGC      |
| Mouse <i>p19Arf</i> R                 | CCTCTTCTCAAGATCCTCTCTAGCCTC     |
| Mouse <i>p21Cip1</i> F                | CCTGGTGATGTCCGACCTGTTC          |
| Mouse <i>p21Cip1</i> R                | CCTCTTCTCAAGATCCTCTCTAGCCTC     |
| Mouse <i>p27Kip1</i> F                | GGTCTCAGGCAAACCTCTGAGGACC       |
| Mouse <i>p27Kip1</i> R                | AGCTGTTTACGTCTGGCGTCAAG         |
| Mouse <i>CyclinD1</i> F               | CGTATCTTACTTCAAGTGCCTGCAGAAG    |
| Mouse <i>CyclinD1</i> R               | CAGGTTCCACTTGAGCTTGTTTAC        |
| Mouse <i>CyclinE1</i> F               | GGATGAGAGCAGTTCTTCTGGATTGG      |
| Mouse <i>CyclinE1</i> R               | GACACAATGGTCAGAGGGCTTAGAC       |
| Mouse <i>CyclinA2</i> F               | CACTGACACCTCTTGACTATCCAATGG     |
| Mouse <i>CyclinA2</i> R               | GCTGAAGCTTCCCTCTTAACACAGAC      |
| Mouse <i>Otx2</i> F                   | TATCTAAAGCAACCGCCTTACG          |
| Mouse <i>Otx2</i> R                   | AAGTCCATACCCGAAGTGGTC           |
| Mouse <i>Ssdp1</i> F                  | CCACCTCACAATCCCAGCAG            |
| Mouse <i>Ssdp1</i> R                  | CCTCGGGGAGGGTTCATTC             |
| Mouse <i>Hex</i> F                    | CGGACGGTGAACGACTACAC            |
| Mouse <i>Hex</i> R                    | CGTTGGAGAACCCTCACTTGAC          |
| Mouse <i>Hesx1</i> F                  | TGAGAGCATTTTAGGACTGGACC         |
| Mouse <i>Hesx1</i> R                  | GGGTGGGTTGCCATCTTTCT            |
| Mouse <i>Dkk1</i> F                   | CTCATCAATTCCAACGCGATCA          |
| Mouse <i>Dkk1</i> R                   | GCCCTCATAGAGAACTCCCG            |
| Mouse <i>Mmp1a</i> F                  | GATGCTATAACTACATTTAGGGGAGAGGTGT |
| Mouse <i>Mmp1a</i> R                  | CTTCATAAGCAGCGTCAAGTTTAACTGGAAG |
| Mouse <i>Mmp3</i> F                   | GGAGAACATGGAGACTTTGTCCCTTTTG    |
| Mouse <i>Mmp3</i> R                   | TTGGCTGAGTGGTAGAGTCCC           |
| Mouse <i>MT1-MMP</i> F                | CAGTATGGCTACCTACCTCCAGG         |
| Mouse <i>MT1-MMP</i> R                | GCCTTGCCTGTCACTTGTAACCC         |
| Mouse <i>Sox1</i> F                   | ATACCGCAATCCCCTCTCAGACG         |
| Mouse <i>Sox1</i> R                   | GCTATGTACAACATCCGACTCCTCTTCC    |
| Mouse <i>Sox2</i> F                   | GCGGAGTGGAACCTTTGTCCG           |
| Mouse <i>Sox2</i> R                   | CGGGAAGCGTGTACTTATCCTTCTTC      |
| Mouse <i>Cdkn2a</i> upstream (ChIP) F | CTATGGCCCAGTTTGAGCTC            |
| Mouse <i>Cdkn2a</i> upstream (ChIP) R | GCTGAGATGATTCGGTGGAT            |
| Mouse <i>p19Arf</i> TSS (ChIP) F      | AAGCTTTCCTCCGCGACT              |
| Mouse <i>p19Arf</i> TSS (ChIP) R      | CATCTTTGCTCCACGCCATCT           |
| Mouse <i>p16Ink4a</i> TSS (ChIP) F    | TTCAGGGCAAATAGCGCCACCTAT        |
| Mouse <i>p16Ink4a</i> TSS (ChIP) R    | TGGGTCCCTCCTTCTTCTCTGA          |
| Mouse <i>p21Cip1</i> TSS (ChIP) F     | CCACTGGACCTAGCAATTCACACGTATTT   |
| Mouse <i>p21Cip1</i> TSS (ChIP) R     | AGAAGTAGGAGTCACCGTCCTGTTTACC    |

**Table S2**

The oligonucleotide sequences utilized in quantitative RT-PCR analysis. F, forward; R, reverse.
